# Supplementary material
Source: publisher figshare collection journal article supplement (https://gsajournals.figshare.com/articles/dataset/_/6160355)
Supplement: Supplementary file 1 [file 2]

Figure S2

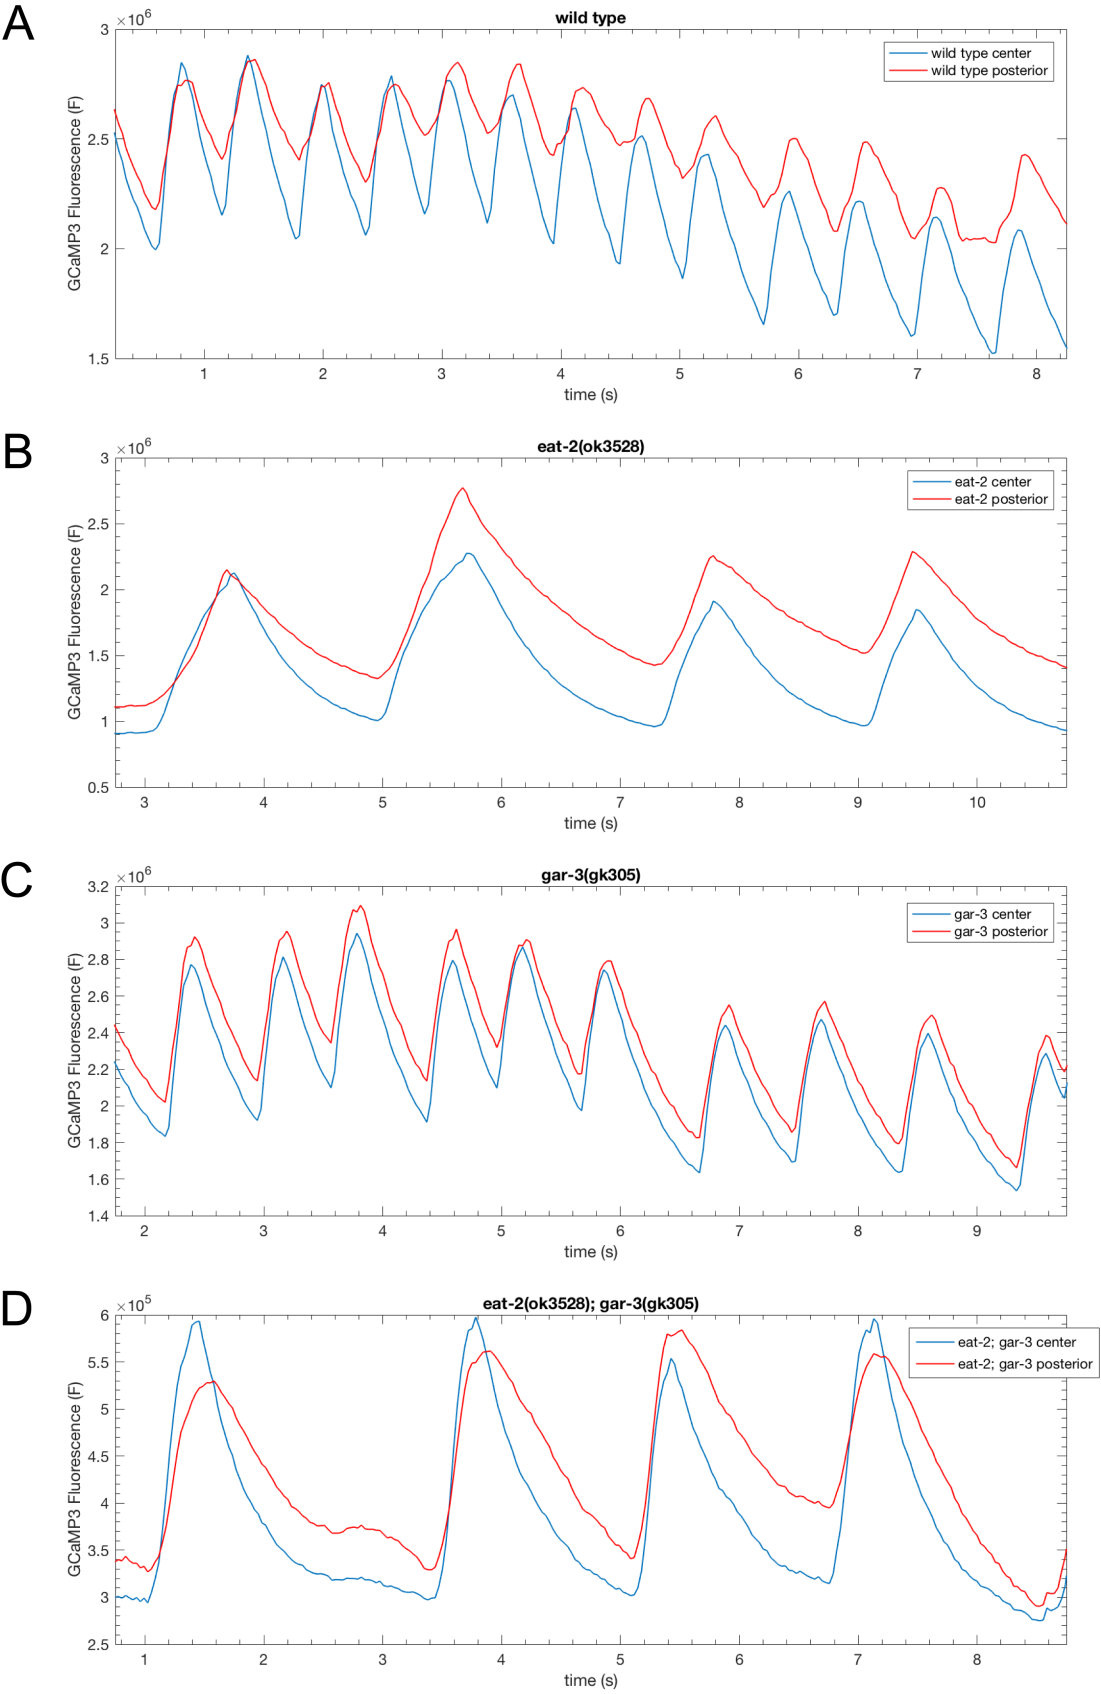

**Figure S2:** Eight second traces of fluorescence intensity (F) in the center (blue) and posterior (red) isthmus of representative animals of the indicated genotypes bearing the *culs36 myo-2<sup>Prom</sup>::GCaMP3* transgene. The data was extracted from (A) Table S14, (B) Table S29, (C) Table S36, and (D) Table S46 at the indicated time points.
