# Supplementary material
Source: publisher figshare collection journal article supplement (https://gsajournals.figshare.com/articles/dataset/_/6160355)
Supplement: Supplementary file 2 [file 2]

**Figure S1**

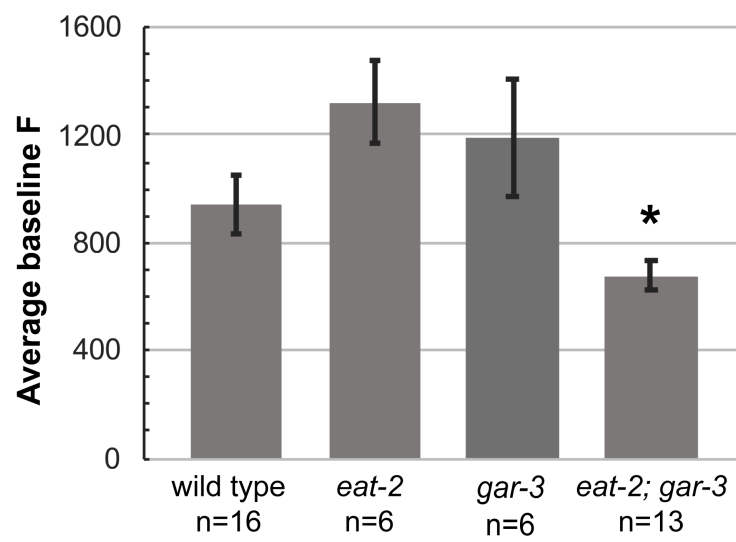

**Figure S1:** Average baseline GCaMP3 fluorescence intensity in the isthmus of adult animals of the indicated genotypes bearing the *myo-2<sup>Prom</sup>::GCaMP3* reporter. Images were acquired from animals under identical conditions and exposure times. Asterisk (\*) indicates a significant difference from wild type values ( $p < 0.05$ ).
