# Supplementary material
Source: publisher figshare collection journal article supplement (https://gsajournals.figshare.com/articles/dataset/_/6160355)
Supplement: Supplementary file 4 [file 2]

**Table S1: Quantification of pharyngeal muscle contractions in *acr* mutants**

| genotype                           | pump rate<br>(pumps/min $\pm$<br>sem) | peristalsis rate<br>(peristalses/min $\pm$<br>sem) | % pumps<br>followed by<br>peristalsis | duration of<br>isthmus<br>peristalsis<br>(ms $\pm$ sem) |
|------------------------------------|---------------------------------------|----------------------------------------------------|---------------------------------------|---------------------------------------------------------|
| wild type <sup>a</sup>             | 218 $\pm$ 11                          | 31 $\pm$ 3                                         | 14%                                   | 113 $\pm$ 4                                             |
| <i>acr-6(ok3117)</i> <sup>b</sup>  | 221 $\pm$ 14                          | 12 $\pm$ 4                                         | 6%                                    | 115 $\pm$ 13                                            |
| <i>acr-7(tm863)</i> <sup>c</sup>   | 198 $\pm$ 3                           | 14 $\pm$ 4                                         | 7%                                    | 119 $\pm$ 7                                             |
| <i>acr-10(ok3118)</i> <sup>d</sup> | 199 $\pm$ 29                          | 20 $\pm$ 6                                         | 12%                                   | 96 $\pm$ 3                                              |
| <i>acr-14(ok1155)</i> <sup>e</sup> | 199 $\pm$ 29                          | 21 $\pm$ 6                                         | 12%                                   | 96 $\pm$ 4                                              |
| <i>acr-16(ok789)</i> <sup>f</sup>  | 184 $\pm$ 9                           | 20 $\pm$ 2                                         | 12%                                   | 118 $\pm$ 7                                             |

<sup>a</sup> 17 N2 L1s were recorded for 19-20 s and a total of 1194 pumps were analyzed.

<sup>b</sup> Six *acr-6* L1s were recorded for 19-20 s and a total of 428 pumps were analyzed.

<sup>c</sup> Six *acr-7* L1s were recorded for 19-20 s and a total of 392 pumps were analyzed.

<sup>d</sup> 21 *acr-10* L1s were recorded for 20-21 s and a total of 1190 pumps were analyzed.

<sup>e</sup> Five *acr-14* L1s were recorded for 19-20 s and a total of 325 pumps were analyzed.

<sup>f</sup> Six *acr-16* L1s were recorded for 19-20 s and a total of 364 pumps were analyzed.
